# Supplementary material for: Chow diet in mouse aging studies: nothing regular about it
Source: PubMed Central journal article supplement (PMC10400503; doi:10.1007/s11357-023-00775-9), 2023-04-20
Supplement: 11357_2023_775_MOESM1_ESM.pdf [file 11357_2023_775_MOESM1_ESM.pdf]

# **Supplemental Data: Diet Formulation PDFs for Manuscript**

## **Manuscript Title:**

Chow diet in mouse aging studies: nothing regular about it

## **Authors:**

Jennifer Lee, Ph.D.<sup>1\*</sup>

Chloe Purello, B.S.<sup>1</sup>

Sarah L. Booth, Ph.D.<sup>1</sup>,

Brian Bennett, Ph.D.<sup>2,3</sup>

Christopher D. Wiley, Ph.D.<sup>1</sup>

Ron Korstanje, Ph.D.<sup>4</sup>

## **Affiliations:**

<sup>1</sup> Jean Mayer USDA Human Nutrition Research Center on Aging at Tufts University, Boston, MA

<sup>2</sup> Agricultural Research Service, US Department of Agriculture, Western Human Nutrition Research Center, Davis, CA, USA

<sup>3</sup> Department of Nutrition, University of California Davis, Davis, CA, USA

<sup>4</sup> The Jackson Laboratory, Bar Harbor, ME

## **Corresponding author:**

\*To whom correspondence should be addressed. Address: JM USDA HNRCA, 711 Washington St, Boston, MA 02111. Phone: (617) 556-3098. Email:

[jen.lee@tufts.edu](mailto:jen.lee@tufts.edu)

# JL Rat & Mouse/Auto 6F EXT

# 5K0G

## GUARANTEED ANALYSIS

|                                   |        |
|-----------------------------------|--------|
| Crude protein not less than ..... | 18.00% |
| Crude fat not less than .....     | 6.00%  |
| Crude fiber not more than .....   | 5.00%  |
| Ash not more than .....           | 8.00%  |
| Moisture not more than .....      | 12.00% |
| Sodium not more than .....        | 0.65%  |
| (California requirement only)     |        |

## INGREDIENTS

Whole Wheat, Ground Corn, Ground Oats, Wheat Middlings, Dehulled Soybean Meal, Fish Meal, Soybean Oil, Dehydrated Alfalfa Meal, Corn Gluten Meal, Dicalcium Phosphate, Brewers Dried Yeast, Calcium Carbonate, Menadione Dimethylpyrimidinol Bisulfite (source of Vitamin K), Salt, DL-Methionine, Choline Chloride, Magnesium Oxide, Thiamine Mononitrate, Pyridoxine Hydrochloride, Cholecalciferol (Form of Vitamin D3), Vitamin A Acetate, Calcium Pantothenate, Ferrous Sulfate, Biotin, Manganous Oxide, Calcium Iodate, DL-Alpha Tocopheryl Acetate (Form of Vitamin E), Folic Acid, Vitamin B-12 Supplement, Riboflavin Supplement, Nicotinic Acid, Cobalt Carbonate, Zinc Oxide, Ferrous Carbonate, Copper Sulfate, Zinc Sulfate.

## FEEDING DIRECTIONS

Feed ad libitum. Plenty of fresh, clean water should be available at all times.

## CHEMICAL COMPOSITION <sup>1</sup>

### Nutrients <sup>2</sup>

|                                                     |             |                                                                                                                                                                                                                                                         |        |
|-----------------------------------------------------|-------------|---------------------------------------------------------------------------------------------------------------------------------------------------------------------------------------------------------------------------------------------------------|--------|
| <b>Protein, %</b>                                   | <b>19.3</b> | Sulfur, %                                                                                                                                                                                                                                               | 0.30   |
| Arginine, %                                         | 1.09        | Sodium, %                                                                                                                                                                                                                                               | 0.29   |
| Cystine, %                                          | 0.36        | Chloride, %                                                                                                                                                                                                                                             | 0.49   |
| Glycine, %                                          | 0.96        | Fluorine, ppm                                                                                                                                                                                                                                           | 35.4   |
| Histidine, %                                        | 0.45        | Iron, ppm                                                                                                                                                                                                                                               | 359    |
| Isoleucine, %                                       | 0.79        | Zinc, ppm                                                                                                                                                                                                                                               | 84     |
| Leucine, %                                          | 1.54        | Manganese, ppm                                                                                                                                                                                                                                          | 156    |
| Lysine, %                                           | 0.97        | Copper, ppm                                                                                                                                                                                                                                             | 11     |
| Methionine, %                                       | 0.62        | Cobalt, ppm                                                                                                                                                                                                                                             | 0.82   |
| Phenylalanine, %                                    | 0.87        | Iodine, ppm                                                                                                                                                                                                                                             | 2.14   |
| Tyrosine, %                                         | 0.58        | Chromium (added), ppm                                                                                                                                                                                                                                   | 0.01   |
| Threonine, %                                        | 0.69        | Selenium, ppm                                                                                                                                                                                                                                           | 0.39   |
| Tryptophan, %                                       | 0.23        |                                                                                                                                                                                                                                                         |        |
| Valine, %                                           | 0.91        | <b>Vitamins</b>                                                                                                                                                                                                                                         |        |
| Serine, %                                           | 0.95        | Carotene, ppm                                                                                                                                                                                                                                           | 1.5    |
| Aspartic Acid, %                                    | 1.88        | Vitamin K, ppm                                                                                                                                                                                                                                          | 20.0   |
| Glutamic Acid, %                                    | 4.40        | Thiamin, ppm                                                                                                                                                                                                                                            | 79.4   |
| Alanine, %                                          | 1.16        | Riboflavin, ppm                                                                                                                                                                                                                                         | 9.1    |
| Proline, %                                          | 1.42        | Niacin, ppm                                                                                                                                                                                                                                             | 87     |
| Taurine, %                                          | 0.05        | Pantothenic Acid, ppm                                                                                                                                                                                                                                   | 37     |
| <b>Fat (ether extract), %</b>                       | <b>6.1</b>  | Choline Chloride, ppm                                                                                                                                                                                                                                   | 2,001  |
| <b>Fat (acid hydrolysis), %</b>                     | <b>7.4</b>  | Folic Acid, ppm                                                                                                                                                                                                                                         | 1.9    |
| Cholesterol, ppm                                    | 243         | Pyridoxine, ppm                                                                                                                                                                                                                                         | 10.0   |
| Linoleic Acid, %                                    | 2.66        | Biotin, ppm                                                                                                                                                                                                                                             | 0.3    |
| Linolenic Acid, %                                   | 0.38        | Vitamin B-12, mcg/kg                                                                                                                                                                                                                                    | 51     |
| Arachidonic Acid, %                                 | 0.02        | Vitamin A, IU/g                                                                                                                                                                                                                                         | 20     |
| Omega-3 Fatty Acids, %                              | 0.63        | Vitamin D-3 (added), IU/g                                                                                                                                                                                                                               | 4.4    |
| Total Saturated Fatty Acids, %                      | 1.14        | Vitamin E, IU/kg                                                                                                                                                                                                                                        | 45     |
| Total Monounsaturated Fatty Acids, %                | 1.27        | Ascorbic Acid, ppm                                                                                                                                                                                                                                      | 0      |
| <b>Fiber (crude), %</b>                             | <b>4.2</b>  | <b>Calories provided by:</b>                                                                                                                                                                                                                            |        |
| Neutral Detergent Fiber <sup>3</sup> , %            | 15.5        | Protein, %                                                                                                                                                                                                                                              | 22.206 |
| Acid Detergent Fiber <sup>4</sup> , %               | 5.2         | Fat (ether extract), %                                                                                                                                                                                                                                  | 15.902 |
| <b>Nitrogen-Free Extract (by difference), %</b>     | <b>53.8</b> | Carbohydrates, %                                                                                                                                                                                                                                        | 61.892 |
| Starch, %                                           | 35.6        |                                                                                                                                                                                                                                                         |        |
| Glucose, %                                          | 0.12        | <sup>*</sup> Product Code                                                                                                                                                                                                                               |        |
| Fructose, %                                         | 0.17        | 1. Formulation based on calculated values from the latest ingredient analysis information. Since nutrient composition of natural ingredients varies and some nutrient loss will occur due to manufacturing processes, analysis will differ accordingly. |        |
| Sucrose, %                                          | 0.69        | 2. Nutrients expressed as percent of ration except where otherwise indicated. Moisture content is assumed to be 10.0% for the purpose of calculations.                                                                                                  |        |
| Lactose, %                                          | 0.00        | 3. NDF = approximately cellulose, hemicellulose and lignin.                                                                                                                                                                                             |        |
| <b>Total Digestible Nutrients, %</b>                | <b>76.4</b> | 4. ADF = approximately cellulose and lignin.                                                                                                                                                                                                            |        |
| <b>Gross Energy, kcal/gm</b>                        | <b>4.18</b> | 5. Physiological Fuel Value (kcal/gm) - Sum of decimal fractions of protein, fat and carbohydrate (use Nitrogen Free Extract) x 4,9,4 kcal/gm respectively.                                                                                             |        |
| <b>Physiological Fuel Value<sup>5</sup>, kcal/g</b> | <b>3.48</b> |                                                                                                                                                                                                                                                         |        |
| <b>Metabolizable Energy, kcal/g</b>                 | <b>3.13</b> |                                                                                                                                                                                                                                                         |        |
| <b>Minerals</b>                                     |             |                                                                                                                                                                                                                                                         |        |
| <b>Ash, %</b>                                       | <b>6.5</b>  |                                                                                                                                                                                                                                                         |        |
| Calcium, %                                          | 1.32        |                                                                                                                                                                                                                                                         |        |
| Phosphorus, %                                       | 0.96        |                                                                                                                                                                                                                                                         |        |
| Phosphorus (non-phytate), %                         | 0.71        |                                                                                                                                                                                                                                                         |        |
| Potassium, %                                        | 0.69        |                                                                                                                                                                                                                                                         |        |
| Magnesium, %                                        | 0.23        |                                                                                                                                                                                                                                                         |        |

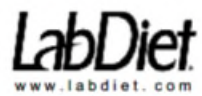

# LabDiet® JL Rat and Mouse/Auto 6F 5K52\*

## DESCRIPTION

LabDiet® Rat and Mouse/Auto 6F 5K52 is an autoclavable, complete life-cycle diet formulated using managed formulation, delivering Constant Nutrition®. This is paired with the selection of highest quality ingredients to assure minimal inherent biological variation in long-term studies. LabDiet 5K52 is similar in formulation to 5K0Q, the primary diet used at The Jackson Laboratories. This diet does not contain added silicon dioxide which helps to reduce diet clumping post-autoclaving.

## Features and Benefits

- **Managed Formulation delivers Constant Nutrition®**
- Excellent diet to meet the nutrient requirements for maintenance, breeding and lactation.
- Is similar in formulation to 5K0Q, the primary diet at The Jackson Laboratory. Specific information on strains fed can be obtained from The Jackson Laboratory.
- Standard cylinder shaped feed pellet.
- Does not contain silicon dioxide, an additive used to reduce diet clumping post-autoclaving.
- Fortified with extra nutrients to compensate for losses during processing and autoclaving.

## Product Forms Available

- 5K52: Cylinder shaped pellet, 3/8" x 3/4" **Catalog #** 0006666

## Other Versions Available

- 5LG4 JL Rat and Mouse Irr 6F (25 lb Cap Sack®) **Catalog #** 0038125
- 5LL4 JL Rat and Mouse Irr 6F **Catalog #** 0051675
- 5 lb vacuum sealed, 6 per box (30 lb box)

## GUARANTEED ANALYSIS

|                             |        |
|-----------------------------|--------|
| Crude protein not less than | 18.00% |
| Crude fat not less than     | 6.00%  |
| Crude fiber not more than   | 5.00%  |
| Ash not more than           | 8.00%  |
| Moisture not more than      | 12.00% |

## AUTOCLAVING SUGGESTIONS

During the autoclaving process, the pellets can be placed on trays, in small bags or in larger bags, as long as the pellets are stacked no more than 3 inches high. When steam autoclaved, the pellets swell and exert force on adjacent pellets. If confined by a bag or container, the pressure causes sticking as greater polymerization of fibrous materials occurs under such conditions. **Assay before and after autoclaving:** Conditions of sterilization must be determined for each autoclaving unit. It is best to assay the diet before and after sterilization to determine nutrient losses. Microbiological studies should be done also to insure the degree of sterilization desired.

## INGREDIENTS

Ground Wheat, Ground Corn, Ground Oats, Wheat Middlings, Fish Meal, Dehulled Soybean Meal, Soybean Oil, Dehydrated Alfalfa Meal, Corn Gluten Meal, Dicalcium Phosphate, Brewers Dried Yeast, Calcium Carbonate, Menadione Dimethylpyrimidinol Bisulfite (source of Vitamin K), Salt, DL-Methionine, Choline Chloride, Magnesium Oxide, Thiamine Mononitrate, Pyridoxine Hydrochloride, Vitamin D3 Supplement, Vitamin A Acetate, Calcium Pantothenate, Ferrous Sulfate, Biotin, Manganous Oxide, Calcium Iodate, Vitamin E Supplement, Folic Acid, Vitamin B-12 Supplement, Riboflavin Supplement, Nicotinic Acid, Zinc Oxide, Ferrous Carbonate, Copper Sulfate, Zinc Sulfate, Cobalt Carbonate.

## FEEDING DIRECTIONS

Feed ad libitum to rodents. Provide plenty of fresh clean water at all times.

For information regarding shelf life please visit [www.labdiet.com](http://www.labdiet.com).

## CHEMICAL COMPOSITION<sup>1</sup>

### Nutrients<sup>2</sup>

|                                                      |             |
|------------------------------------------------------|-------------|
| <b>Protein, %</b>                                    | <b>19.3</b> |
| Arginine, %                                          | 1.08        |
| Cystine, %                                           | 0.35        |
| Glycine, %                                           | 0.95        |
| Histidine, %                                         | 0.45        |
| Isoleucine, %                                        | 0.77        |
| Leucine, %                                           | 1.53        |
| Lysine, %                                            | 0.97        |
| Methionine, %                                        | 0.63        |
| Phenylalanine, %                                     | 0.86        |
| Tyrosine, %                                          | 0.57        |
| Threonine, %                                         | 0.69        |
| Tryptophan, %                                        | 0.22        |
| Valine, %                                            | 0.90        |
| Serine, %                                            | 0.92        |
| Aspartic Acid, %                                     | 1.84        |
| Glutamic Acid, %                                     | 4.20        |
| Alanine, %                                           | 1.17        |
| Proline, %                                           | 1.40        |
| Taurine, %                                           | 0.05        |
| <b>Fat (ether extract), %</b>                        | <b>6.5</b>  |
| <b>Fat (acid hydrolysis), %</b>                      | <b>7.8</b>  |
| Cholesterol, ppm                                     | .247        |
| Linoleic Acid, %                                     | 2.87        |
| Linolenic Acid, %                                    | 0.40        |
| Arachidonic Acid, %                                  | 0.02        |
| Omega-3 Fatty Acids, %                               | 0.63        |
| Total Saturated Fatty Acids, %                       | 1.17        |
| Total Monounsaturated Fatty Acids, %                 | 1.42        |
| <b>Fiber (Crude), %</b>                              | <b>4.1</b>  |
| Neutral Detergent Fiber <sup>3</sup> , %             | 15.3        |
| Acid Detergent Fiber <sup>4</sup> , %                | 5.1         |
| <b>Nitrogen-Free Extract (by difference), %</b>      | <b>53.6</b> |
| Starch, %                                            | 35.9        |
| Sucrose, %                                           | 0.79        |
| <b>Total Digestible Nutrients, %</b>                 | <b>76.5</b> |
| <b>Gross Energy, kcal/gm</b>                         | <b>4.21</b> |
| <b>Physiological Fuel Value<sup>5</sup>, kcal/gm</b> | <b>3.50</b> |
| <b>Metabolizable Energy, kcal/gm</b>                 | <b>3.14</b> |

|                       |      |
|-----------------------|------|
| Iron, ppm             | .360 |
| Zinc, ppm             | .82  |
| Manganese, ppm        | .160 |
| Copper, ppm           | .10  |
| Cobalt, ppm           | 0.82 |
| Iodine, ppm           | 2.2  |
| Chromium (added), ppm | 0.01 |
| Selenium, ppm         | 0.39 |

|                                       |       |
|---------------------------------------|-------|
| <b>Vitamins</b>                       |       |
| Carotene, ppm                         | 1.5   |
| Vitamin K, ppm                        | 20    |
| Thiamin, ppm                          | .80   |
| Riboflavin, ppm                       | 9.0   |
| Niacin, ppm                           | .86   |
| Pantothenic Acid, ppm                 | .37   |
| Choline Chloride, ppm                 | .2000 |
| Folic Acid, ppm                       | 1.9   |
| Pyridoxine, ppm                       | .10   |
| Biotin, ppm                           | 0.30  |
| B <sub>12</sub> , mcg/kg              | .51   |
| Vitamin A, IU/gm                      | .20   |
| Vitamin D <sub>3</sub> (added), IU/gm | 4.4   |
| Vitamin E, IU/kg                      | .45   |
| Ascorbic Acid, mg/gm                  | 0.0   |

### Calories provided by:

|                        |        |
|------------------------|--------|
| Protein, %             | 22.088 |
| Fat (ether extract), % | 16.618 |
| Carbohydrates, %       | 61.294 |

### \*Product Code

1. Formulation based on calculated values from the latest ingredient analysis information. Since nutrient composition of natural ingredients varies and some nutrient loss will occur due to manufacturing processes, analysis will differ accordingly.
2. Nutrients expressed as percent of ration except where otherwise indicated. Moisture content is assumed to be 10.0% for the purpose of calculations.
3. NDF = approximately cellulose, hemicellulose and lignin.
4. ADF = approximately cellulose and lignin.
5. Physiological Fuel Value (kcal/gm) = Sum of decimal fractions of protein, fat and carbohydrate (use Nitrogen Free Extract) x 4,9,4 kcal/gm respectively.

**NOTE: When assayed, actual levels may vary from calculated values.**

### Minerals

|                             |            |
|-----------------------------|------------|
| <b>Ash, %</b>               | <b>6.5</b> |
| Calcium, %                  | 1.32       |
| Phosphorus, %               | 0.95       |
| Phosphorus (non-phytate), % | 0.71       |
| Potassium, %                | 0.66       |
| Magnesium, %                | 0.22       |
| Sulfur, %                   | 0.30       |
| Sodium, %                   | 0.28       |
| Chloride, %                 | 0.49       |
| Fluorine, ppm               | .36        |

# Formulab Diet Formulab Diet, Irradiated

5008\*  
5008C33\*

## DESCRIPTION

Formulab Diet is formulated to supply complete life-cycle nutrition for use in breeding colonies of rats and hamsters and many mouse strains. This diet is formulated using the unique and innovative concept of Constant Nutrition<sup>®</sup>, paired with the selection of highest quality ingredients to assure minimal inherent biological variation in long-term studies. The high energy, high quality protein formulation of this diet maximizes reproduction of rats and hamsters and is an excellent life-cycle diet for most rodents.

### Features and Benefits

- Similar nutrient concentration to 5001, with higher energy content
- Maximizes reproductive performance of rats and hamsters; supports gestation and lactation simultaneously
- High quality animal protein added to create a superior balance of amino acids for optimum performance
- Formulated to feed rats, hamsters and many mouse strains
- Single product inventory
- Available in Irradiated or Non-Irradiated form
- ZDF rats were developed using 5008

### Product Forms Available

- Oval pellet, 10 mm x 16 mm x 25 mm length (3/8"x5/8"x1")
  - Non-Irradiated available in 15 kg or 50 lb paper sacks
  - Irradiated available in 25 lb paper sacks
- Meal (ground pellets), special order

## GUARANTEED ANALYSIS

|                              |       |
|------------------------------|-------|
| Crude protein not less than  | 23.0% |
| Crude fat not less than      | 6.5%  |
| Crude fiber not more than    | 4.0%  |
| Ash not more than            | 8.0%  |
| Added minerals not more than | 2.5%  |

## INGREDIENTS

Ground corn, dehulled soybean meal, ground wheat, fish meal, wheat middlings, porcine animal fat preserved with BHA, cane molasses, brewers dried yeast, porcine meat meal, wheat germ, ground oats, dried beet pulp, dehydrated alfalfa meal, calcium carbonate, dried whey, salt, menadione dimethylpyrimidinol bisulfite, choline chloride, cholecalciferol, vitamin A acetate, pyridoxine hydrochloride, dl-alpha tocopheryl acetate, thiamin mononitrate, folic acid, DL-methionine, nicotinic acid, calcium pantothenate, riboflavin, vitamin B<sub>12</sub> supplement, manganese oxide, zinc oxide, ferrous carbonate, copper sulfate, zinc sulfate, calcium iodate, cobalt carbonate.

## FEEDING DIRECTIONS

Plenty of fresh, clean water should be available to the animals at all times.

**Rats-** All rats will eat varying amounts of feed depending on their genetic origin. Larger strains will eat between 15-30 grams per day. Smaller strains will eat between 12-15 grams per day. Feeders in rat cages should be designed to hold two to three days supply of feed at one time.

**Mice-** Adult mice will eat 4 to 5 grams of pelleted ration daily. Some of the larger strains may eat as much as 8 grams per day per animal. Feed should be available on a free choice basis in wire feeders above the floor of the cage.

**Hamsters-** Adults will eat 10 to 14 grams per day.

## CHEMICAL COMPOSITION<sup>1</sup>

### Nutrients<sup>2</sup>

|                                                      |             |
|------------------------------------------------------|-------------|
| <b>Protein, %</b>                                    | <b>23.5</b> |
| Arginine, %                                          | 1.44        |
| Cystine, %                                           | 0.35        |
| Glycine, %                                           | 1.23        |
| Histidine, %                                         | 0.58        |
| Isoleucine, %                                        | 1.20        |
| Leucine, %                                           | 1.87        |
| Lysine, %                                            | 1.40        |
| Methionine, %                                        | 0.43        |
| Phenylalanine, %                                     | 1.08        |
| Tyrosine, %                                          | 0.66        |
| Threonine, %                                         | 0.90        |
| Tryptophan, %                                        | 0.28        |
| Valine, %                                            | 1.19        |
| Serine, %                                            | 1.20        |
| Aspartic Acid, %                                     | 2.60        |
| Glutamic Acid, %                                     | 4.77        |
| Alanine, %                                           | 1.39        |
| Proline, %                                           | 1.63        |
| Taurine, %                                           | 0.02        |
| <b>Fat (ether extract), %</b>                        | <b>6.5</b>  |
| <b>Fat (acid hydrolysis), %</b>                      | <b>7.5</b>  |
| Cholesterol, ppm                                     | 280         |
| Linoleic Acid, %                                     | 1.37        |
| Linolenic Acid, %                                    | 0.09        |
| Arachidonic Acid, %                                  | 0.01        |
| Omega-3 Fatty Acids, %                               | 0.29        |
| Total Saturated Fatty Acids, %                       | 2.51        |
| Total Monounsaturated Fatty Acids, %                 | 2.32        |
| <b>Fiber (Crude), %</b>                              | <b>3.8</b>  |
| Neutral Detergent Fiber <sup>3</sup> , %             | 11.3        |
| Acid Detergent Fiber <sup>3</sup> , %                | 4.0         |
| <b>Nitrogen-Free Extract (by difference), %</b>      | <b>49.4</b> |
| Starch, %                                            | 34.9        |
| Glucose, %                                           | 0.22        |
| Fructose, %                                          | 0.24        |
| Sucrose, %                                           | 2.57        |
| Lactose, %                                           | 0.39        |
| <b>Total Digestible Nutrients, %</b>                 | <b>81.2</b> |
| <b>Gross Energy, kcal/gm</b>                         | <b>4.15</b> |
| <b>Physiological Fuel Value<sup>4</sup>, kcal/gm</b> | <b>3.50</b> |
| <b>Metabolizable Energy, kcal/gm</b>                 | <b>3.31</b> |

### Minerals

|                             |            |
|-----------------------------|------------|
| <b>Ash, %</b>               | <b>6.8</b> |
| Calcium, %                  | 1.00       |
| Phosphorus, %               | 0.65       |
| Phosphorus (non-phytate), % | 0.42       |
| Potassium, %                | 1.10       |
| Magnesium, %                | 0.20       |

|                |      |
|----------------|------|
| Sulfur, %      | 0.24 |
| Sodium, %      | 0.28 |
| Chlorine, %    | 0.48 |
| Fluorine, ppm  | 19   |
| Iron, ppm      | 230  |
| Zinc, ppm      | 73   |
| Manganese, ppm | 71   |
| Copper, ppm    | 13   |
| Cobalt, ppm    | 0.4  |
| Iodine, ppm    | 0.8  |
| Chromium, ppm  | 1.4  |
| Selenium, ppm  | 0.23 |

### Vitamins

|                               |      |
|-------------------------------|------|
| Carotene, ppm                 | 4.0  |
| Vitamin K (as menadione), ppm | 3.2  |
| Thiamin Hydrochloride, ppm    | 16   |
| Riboflavin, ppm               | 5.0  |
| Niacin, ppm                   | 109  |
| Pantothenic Acid, ppm         | 15   |
| Choline Chloride, ppm         | 2000 |
| Folic Acid, ppm               | 3.0  |
| Pyridoxine, ppm               | 6.0  |
| Biotin, ppm                   | 0.20 |
| B <sub>12</sub> , mcg/kg      | 20   |
| Vitamin A, IU/gm              | 15   |
| Vitamin D, (added), IU/gm     | 3.3  |
| Vitamin E, IU/kg              | 55   |
| Ascorbic Acid, mg/gm          | —    |

### Calories provided by:

|                        |        |
|------------------------|--------|
| Protein, %             | 26.849 |
| Fat (ether extract), % | 16.710 |
| Carbohydrates, %       | 56.441 |

### \*Product Code

1. Formulation based on calculated values from the latest ingredient analysis information. Since nutrient composition of natural ingredients varies and some nutrient loss will occur due to manufacturing processes, analysis will differ accordingly.
2. Nutrients expressed as percent of ration except where otherwise indicated. Moisture content is assumed to be 10.0% for the purpose of calculations.
3. NDF = approximately cellulose, hemicellulose and lignin.
4. ADF = approximately cellulose and lignin.
5. Physiological Fuel Value (kcal/gm) = Sum of decimal fractions of protein, fat and carbohydrate (use Nitrogen Free Extract) x 4,9,4 kcal/gm respectively.

## NIH-31 Open Formula Mouse/Rat Sterilizable Diet

**Product Description-** 7017 is a fixed and open formula, autoclavable diet manufactured with high quality ingredients and designed to support maintenance, growth, and reproduction of rodents. 7017 is supplemented with additional vitamins to ensure nutritional adequacy after autoclaving.

**Also available certified (7017C) and irradiated (7917).**

**Ingredients** (in descending order of inclusion)- Ground wheat, ground corn, ground oats, wheat middlings, fish meal, dehulled soybean meal, dehydrated alfalfa meal, corn gluten meal, soybean oil, dicalcium phosphate, brewers dried yeast, calcium carbonate, iodized salt, choline chloride, magnesium oxide, kaolin, ferrous sulfate, menadione sodium bisulfite complex (source of vitamin K activity), manganous oxide, thiamin mononitrate, niacin, calcium pantothenate, vitamin E acetate, vitamin A acetate, copper sulfate, zinc oxide, riboflavin, pyridoxine hydrochloride, vitamin B<sub>12</sub> supplement, vitamin D<sub>3</sub> supplement, calcium iodate, biotin, folic acid, cobalt carbonate.

Standard Product Form: **Pellet**

| Macronutrients                        |               |            |
|---------------------------------------|---------------|------------|
| Crude Protein                         | %             | 18.0       |
| Fat (ether extract) <sup>a</sup>      | %             | 4.7        |
| Carbohydrate (available) <sup>b</sup> | %             | 46.5       |
| Crude Fiber                           | %             | 4.0        |
| Neutral Detergent Fiber <sup>c</sup>  | %             | 13.6       |
| Ash                                   | %             | 6.2        |
| Energy Density <sup>d</sup>           | kcal/g (kJ/g) | 3.0 (12.6) |
| Calories from Protein                 | %             | 24         |
| Calories from Fat                     | %             | 14         |
| Calories from Carbohydrate            | %             | 62         |

| Minerals               |       |      |
|------------------------|-------|------|
| Calcium                | %     | 1.1  |
| Phosphorus             | %     | 1.0  |
| Non-Phytate Phosphorus | %     | 0.7  |
| Sodium                 | %     | 0.3  |
| Potassium              | %     | 0.6  |
| Chloride               | %     | 0.5  |
| Magnesium              | %     | 0.2  |
| Zinc                   | mg/kg | 47   |
| Manganese              | mg/kg | 155  |
| Copper                 | mg/kg | 13   |
| Iodine                 | mg/kg | 2    |
| Iron                   | mg/kg | 270  |
| Selenium               | mg/kg | 0.30 |

| Amino Acids   |   |     |
|---------------|---|-----|
| Aspartic Acid | % | 1.5 |
| Glutamic Acid | % | 3.2 |
| Alanine       | % | 1.1 |
| Glycine       | % | 1.0 |
| Threonine     | % | 0.7 |
| Proline       | % | 1.5 |
| Serine        | % | 0.9 |
| Leucine       | % | 1.4 |
| Isoleucine    | % | 0.8 |
| Valine        | % | 0.8 |
| Phenylalanine | % | 0.8 |
| Tyrosine      | % | 0.7 |
| Methionine    | % | 0.4 |
| Cystine       | % | 0.3 |
| Lysine        | % | 0.8 |
| Histidine     | % | 0.4 |
| Arginine      | % | 1.0 |
| Tryptophan    | % | 0.2 |

| Vitamins                                 |       |      |
|------------------------------------------|-------|------|
| Vitamin A <sup>e,1</sup>                 | IU/g  | 24.2 |
| Vitamin D <sub>3</sub> <sup>e,2</sup>    | IU/g  | 4.2  |
| Vitamin E                                | IU/kg | 41   |
| Vitamin K <sub>3</sub> (menadione)       | mg/kg | 22   |
| Vitamin B <sub>1</sub> (thiamin)         | mg/kg | 76   |
| Vitamin B <sub>2</sub> (riboflavin)      | mg/kg | 7    |
| Niacin (nicotinic acid)                  | mg/kg | 87   |
| Vitamin B <sub>6</sub> (pyridoxine)      | mg/kg | 9    |
| Pantothenic Acid                         | mg/kg | 39   |
| Vitamin B <sub>12</sub> (cyanocobalamin) | mg/kg | 0.06 |
| Biotin                                   | mg/kg | 0.30 |
| Folate                                   | mg/kg | 2    |
| Choline                                  | mg/kg | 1890 |

| Fatty Acids           |   |     |
|-----------------------|---|-----|
| C16:0 Palmitic        | % | 0.7 |
| C18:0 Stearic         | % | 0.1 |
| C18:1ω9 Oleic         | % | 1.0 |
| C18:2ω6 Linoleic      | % | 1.9 |
| C18:3ω3 Linolenic     | % | 0.2 |
| Total Saturated       | % | 0.9 |
| Total Monounsaturated | % | 1.2 |
| Total Polyunsaturated | % | 2.1 |

| Other       |       |    |
|-------------|-------|----|
| Cholesterol | mg/kg | 50 |

<sup>a</sup> Ether extract is used to measure fat in pelleted diets, while an acid hydrolysis method is required to recover fat in extruded diets. Compared to ether extract, the fat value for acid hydrolysis will be approximately 1% point higher.

<sup>b</sup> Carbohydrate (available) is calculated by subtracting neutral detergent fiber from total carbohydrates.

<sup>c</sup> Neutral detergent fiber is an estimate of insoluble fiber, including cellulose, hemicellulose, and lignin. Crude fiber methodology underestimates total fiber.

<sup>d</sup> Energy density is a calculated estimate of metabolizable energy based on the Atwater factors assigning 4 kcal/g to protein, 9 kcal/g to fat, and 4 kcal/g to available carbohydrate.

<sup>e</sup> Indicates added amount but does not account for contribution from other ingredients.

<sup>1</sup> 1 IU vitamin A = 0.3 µg retinol

<sup>2</sup> 1 IU vitamin D = 25 ng cholecalciferol

For nutrients not listed, insufficient data is available to quantify.

Nutrient data represent the best information available, calculated from published values and direct analytical testing of raw materials and finished product. Nutrient values may vary due to the natural variations in the ingredients, analysis, and effects of processing.

Teklad Diets are designed and manufactured for research purposes only.

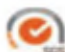

## Teklad LM-485 Mouse/Rat Sterilizable Diet

**Product Description-** 7012 is a fixed formula, autoclavable diet manufactured with high quality ingredients and designed to support growth and reproduction of rodents. Typical isoflavone concentrations (daidzein + genistein aglycone equivalents) range from 300 to 600 mg/kg. Absence of animal protein and fish meal minimizes the presence of nitrosamines. 7012 is supplemented with additional vitamins to ensure nutritional adequacy after autoclaving. **Also available certified (7012C) and irradiated (7912).**

**Macronutrients**

|                                       |               |            |
|---------------------------------------|---------------|------------|
| Crude Protein                         | %             | 19.1       |
| Fat (ether extract) <sup>a</sup>      | %             | 5.8        |
| Carbohydrate (available) <sup>b</sup> | %             | 44.3       |
| Crude Fiber                           | %             | 4.6        |
| Neutral Detergent Fiber <sup>c</sup>  | %             | 13.7       |
| Ash                                   | %             | 6.1        |
| Energy Density <sup>d</sup>           | kcal/g (kJ/g) | 3.1 (13.0) |
| Calories from Protein                 | %             | 25         |
| Calories from Fat                     | %             | 17         |
| Calories from Carbohydrate            | %             | 58         |

**Minerals**

|                        |       |      |
|------------------------|-------|------|
| Calcium                | %     | 1.0  |
| Phosphorus             | %     | 0.7  |
| Non-Phytate Phosphorus | %     | 0.4  |
| Sodium                 | %     | 0.3  |
| Potassium              | %     | 0.8  |
| Chloride               | %     | 0.5  |
| Magnesium              | %     | 0.2  |
| Zinc                   | mg/kg | 63   |
| Manganese              | mg/kg | 93   |
| Copper                 | mg/kg | 23   |
| Iodine                 | mg/kg | 3    |
| Iron                   | mg/kg | 240  |
| Selenium               | mg/kg | 0.16 |

**Amino Acids**

|               |   |     |
|---------------|---|-----|
| Aspartic Acid | % | 1.8 |
| Glutamic Acid | % | 2.8 |
| Alanine       | % | 1.0 |
| Glycine       | % | 0.8 |
| Threonine     | % | 0.8 |
| Proline       | % | 1.4 |
| Serine        | % | 1.3 |
| Leucine       | % | 1.7 |
| Isoleucine    | % | 0.8 |
| Valine        | % | 0.9 |
| Phenylalanine | % | 0.9 |
| Tyrosine      | % | 0.8 |
| Methionine    | % | 0.4 |
| Cystine       | % | 0.3 |
| Lysine        | % | 1.0 |
| Histidine     | % | 0.5 |
| Arginine      | % | 1.2 |
| Tryptophan    | % | 0.3 |

Teklad Diets are designed and manufactured for research purposes only.

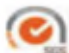

**Ingredients** (in descending order of inclusion)- Ground corn, dehulled soybean meal, ground oats, wheat middlings, dehydrated alfalfa meal, soybean oil, corn gluten meal, calcium carbonate, dicalcium phosphate, brewers dried yeast, iodized salt, choline chloride, kaolin, magnesium oxide, L-lysine, DL-methionine, ferrous sulfate, menadione sodium bisulfite complex (source of vitamin K activity), vitamin E acetate, thiamin mononitrate, calcium pantothenate, manganous oxide, niacin, copper sulfate, zinc oxide, vitamin A acetate, pyridoxine hydrochloride, riboflavin, vitamin D<sub>3</sub> supplement, vitamin B<sub>12</sub> supplement, folic acid, biotin, calcium iodate, cobalt carbonate.

Standard Product Form: **Pellet**

**Vitamins**

|                                          |       |      |
|------------------------------------------|-------|------|
| Vitamin A <sup>e,1</sup>                 | IU/g  | 30.0 |
| Vitamin D <sub>3</sub> <sup>e,2</sup>    | IU/g  | 2.4  |
| Vitamin E                                | IU/kg | 150  |
| Vitamin K <sub>3</sub> (menadione)       | mg/kg | 80   |
| Vitamin B <sub>1</sub> (thiamin)         | mg/kg | 95   |
| Vitamin B <sub>2</sub> (riboflavin)      | mg/kg | 14   |
| Niacin (nicotinic acid)                  | mg/kg | 100  |
| Vitamin B <sub>6</sub> (pyridoxine)      | mg/kg | 17   |
| Pantothenic Acid                         | mg/kg | 87   |
| Vitamin B <sub>12</sub> (cyanocobalamin) | mg/kg | 0.09 |
| Biotin                                   | mg/kg | 0.77 |
| Folate                                   | mg/kg | 7    |
| Choline                                  | mg/kg | 2200 |

**Fatty Acids**

|                       |   |     |
|-----------------------|---|-----|
| C16:0 Palmitic        | % | 0.6 |
| C18:0 Stearic         | % | 0.2 |
| C18:1ω9 Oleic         | % | 1.3 |
| C18:2ω6 Linoleic      | % | 2.6 |
| C18:3ω3 Linolenic     | % | 0.3 |
| Total Saturated       | % | 0.8 |
| Total Monounsaturated | % | 1.3 |
| Total Polyunsaturated | % | 2.9 |

**Other**

|             |       |    |
|-------------|-------|----|
| Cholesterol | mg/kg | -- |
|-------------|-------|----|

<sup>a</sup> Ether extract is used to measure fat in pelleted diets, while an acid hydrolysis method is required to recover fat in extruded diets. Compared to ether extract, the fat value for acid hydrolysis will be approximately 1% point higher.

<sup>b</sup> Carbohydrate (available) is calculated by subtracting neutral detergent fiber from total carbohydrates.

<sup>c</sup> Neutral detergent fiber is an estimate of insoluble fiber, including cellulose, hemicellulose, and lignin. Crude fiber methodology underestimates total fiber.

<sup>d</sup> Energy density is a calculated estimate of metabolizable energy based on the Atwater factors assigning 4 kcal/g to protein, 9 kcal/g to fat, and 4 kcal/g to available carbohydrate.

<sup>e</sup> Indicates added amount but does not account for contribution from other ingredients.

<sup>1</sup> 1 IU vitamin A = 0.3 µg retinol

<sup>2</sup> 1 IU vitamin D = 25 ng cholecalciferol

For nutrients not listed, insufficient data is available to quantify.

Nutrient data represent the best information available, calculated from published values and direct analytical testing of raw materials and finished product. Nutrient values may vary due to the natural variations in the ingredients, analysis, and effects of processing.

## Teklad Global 18% Protein Rodent Diet

**Product Description-** 2018 is a fixed formula, non-autoclavable diet manufactured with high quality ingredients and designed to support gestation, lactation, and growth of rodents. 2018 does not contain alfalfa, thus lowering the occurrence of natural phytoestrogens. Typical isoflavone concentrations (daidzein + genistein aglycone equivalents) range from 150 to 250 mg/kg. Exclusion of alfalfa reduces chlorophyll, improving optical imaging clarity. Absence of animal protein and fish meal minimizes the presence of nitrosamines. **Also available certified (2018C) and irradiated (2918). For autoclavable diet, refer to 2018S (Sterilizable) or 2018SX (Extruded & Sterilizable).**

### Macronutrients

|                                       |               |            |
|---------------------------------------|---------------|------------|
| Crude Protein                         | %             | 18.6       |
| Fat (ether extract) <sup>a</sup>      | %             | 6.2        |
| Carbohydrate (available) <sup>b</sup> | %             | 44.2       |
| Crude Fiber                           | %             | 3.5        |
| Neutral Detergent Fiber <sup>c</sup>  | %             | 14.7       |
| Ash                                   | %             | 5.3        |
| Energy Density <sup>d</sup>           | kcal/g (kJ/g) | 3.1 (13.0) |
| Calories from Protein                 | %             | 24         |
| Calories from Fat                     | %             | 18         |
| Calories from Carbohydrate            | %             | 58         |

### Minerals

|                        |       |      |
|------------------------|-------|------|
| Calcium                | %     | 1.0  |
| Phosphorus             | %     | 0.7  |
| Non-Phytate Phosphorus | %     | 0.4  |
| Sodium                 | %     | 0.2  |
| Potassium              | %     | 0.6  |
| Chloride               | %     | 0.4  |
| Magnesium              | %     | 0.2  |
| Zinc                   | mg/kg | 70   |
| Manganese              | mg/kg | 100  |
| Copper                 | mg/kg | 15   |
| Iodine                 | mg/kg | 6    |
| Iron                   | mg/kg | 200  |
| Selenium               | mg/kg | 0.23 |

### Amino Acids

|               |   |     |
|---------------|---|-----|
| Aspartic Acid | % | 1.4 |
| Glutamic Acid | % | 3.4 |
| Alanine       | % | 1.1 |
| Glycine       | % | 0.8 |
| Threonine     | % | 0.7 |
| Proline       | % | 1.6 |
| Serine        | % | 1.1 |
| Leucine       | % | 1.8 |
| Isoleucine    | % | 0.8 |
| Valine        | % | 0.9 |
| Phenylalanine | % | 1.0 |
| Tyrosine      | % | 0.6 |
| Methionine    | % | 0.4 |
| Cystine       | % | 0.3 |
| Lysine        | % | 0.9 |
| Histidine     | % | 0.4 |
| Arginine      | % | 1.0 |
| Tryptophan    | % | 0.2 |

Teklad Diets are designed and manufactured for research purposes only.

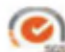

**Ingredients** (in descending order of inclusion)- Ground wheat, ground corn, wheat middlings, dehulled soybean meal, corn gluten meal, soybean oil, calcium carbonate, dicalcium phosphate, brewers dried yeast, iodized salt, L-lysine, DL-methionine, choline chloride, kaolin, magnesium oxide, vitamin E acetate, menadione sodium bisulfite complex (source of vitamin K activity), manganous oxide, ferrous sulfate, zinc oxide, niacin, calcium pantothenate, copper sulfate, pyridoxine hydrochloride, riboflavin, thiamin mononitrate, vitamin A acetate, calcium iodate, vitamin B<sub>12</sub> supplement, folic acid, biotin, vitamin D<sub>3</sub> supplement, cobalt carbonate.

Standard Product Form: **Pellet**

### Vitamins

|                                          |       |      |
|------------------------------------------|-------|------|
| Vitamin A <sup>e, f</sup>                | IU/g  | 15.0 |
| Vitamin D <sub>3</sub> <sup>e, g</sup>   | IU/g  | 1.5  |
| Vitamin E                                | IU/kg | 110  |
| Vitamin K <sub>3</sub> (menadione)       | mg/kg | 50   |
| Vitamin B <sub>1</sub> (thiamin)         | mg/kg | 17   |
| Vitamin B <sub>2</sub> (riboflavin)      | mg/kg | 15   |
| Niacin (nicotinic acid)                  | mg/kg | 70   |
| Vitamin B <sub>6</sub> (pyridoxine)      | mg/kg | 18   |
| Pantothenic Acid                         | mg/kg | 33   |
| Vitamin B <sub>12</sub> (cyanocobalamin) | mg/kg | 0.08 |
| Biotin                                   | mg/kg | 0.40 |
| Folate                                   | mg/kg | 4    |
| Choline                                  | mg/kg | 1200 |

### Fatty Acids

|                       |   |     |
|-----------------------|---|-----|
| C18:0 Palmitic        | % | 0.7 |
| C18:0 Stearic         | % | 0.2 |
| C18:1n7 Oleic         | % | 1.2 |
| C18:2n6 Linoleic      | % | 3.1 |
| C18:3n3 Linolenic     | % | 0.3 |
| Total Saturated       | % | 0.9 |
| Total Monounsaturated | % | 1.3 |
| Total Polyunsaturated | % | 3.4 |

### Other

|             |       |    |
|-------------|-------|----|
| Cholesterol | mg/kg | -- |
|-------------|-------|----|

<sup>a</sup> Ether extract is used to measure fat in pelleted diets, while an acid hydrolysis method is required to recover fat in extruded diets. Compared to ether extract, the fat value for acid hydrolysis will be approximately 1% point higher.

<sup>b</sup> Carbohydrate (available) is calculated by subtracting neutral detergent fiber from total carbohydrates.

<sup>c</sup> Neutral detergent fiber is an estimate of insoluble fiber, including cellulose, hemicellulose, and lignin. Crude fiber methodology underestimates total fiber.

<sup>d</sup> Energy density is a calculated estimate of metabolizable energy based on the Atwater factors assigning 4 kcal/g to protein, 9 kcal/g to fat, and 4 kcal/g to available carbohydrate.

<sup>e</sup> Indicates added amount but does not account for contribution from other ingredients.

<sup>f</sup> 1 IU vitamin A = 0.3 µg retinol

<sup>g</sup> 1 IU vitamin D = 25 ng cholecalciferol

For nutrients not listed, insufficient data is available to quantify.

Nutrient data represent the best information available, calculated from published values and direct analytical testing of raw materials and finished product. Nutrient values may vary due to the natural variations in the ingredients, analysis, and effects of processing.

## Teklad Global 16% Protein Rodent Diet

**Product Description-** 2016 is a fixed formula, non-autoclavable diet manufactured with high quality ingredients and designed to support growth and maintenance. 2016 does not contain alfalfa or soybean meal, thus minimizing the occurrence of natural phytoestrogens. Typical isoflavone concentrations (daidzein + genistein aglycone equivalents) range from non-detectable to 20 mg/kg. Exclusion of alfalfa reduces chlorophyll, improving optical imaging clarity. Absence of animal protein and fish meal minimizes the presence of nitrosamines. **Also available certified (2016C) and irradiated (2016).** For autoclavable diet, refer to 2016S (Sterilizable).

**Ingredients** (in descending order of inclusion)- Ground wheat, ground corn, wheat middlings, corn gluten meal, calcium carbonate, dicalcium phosphate, soybean oil, brewers dried yeast, iodized salt, L-lysine, DL-methionine, choline chloride, magnesium oxide, vitamin E acetate, menadione sodium bisulfite complex (source of vitamin K activity), manganous oxide, ferrous sulfate, zinc oxide, niacin, calcium pantothenate, copper sulfate, pyridoxine hydrochloride, riboflavin, thiamin mononitrate, vitamin A acetate, calcium iodate, vitamin B<sub>12</sub> supplement, folic acid, biotin, vitamin D<sub>3</sub> supplement, cobalt carbonate.

Standard Product Form: *Pellet*

| Macronutrients                        |               |            |
|---------------------------------------|---------------|------------|
| Crude Protein                         | %             | 16.4       |
| Fat (ether extract) <sup>a</sup>      | %             | 4.0        |
| Carbohydrate (available) <sup>b</sup> | %             | 48.5       |
| Crude Fiber                           | %             | 3.3        |
| Neutral Detergent Fiber <sup>c</sup>  | %             | 15.2       |
| Ash                                   | %             | 4.9        |
| Energy Density <sup>d</sup>           | kcal/g (kJ/g) | 3.0 (12.6) |
| Calories from Protein                 | %             | 22         |
| Calories from Fat                     | %             | 12         |
| Calories from Carbohydrate            | %             | 66         |

| Minerals               |       |      |
|------------------------|-------|------|
| Calcium                | %     | 1.0  |
| Phosphorus             | %     | 0.7  |
| Non-Phytate Phosphorus | %     | 0.4  |
| Sodium                 | %     | 0.2  |
| Potassium              | %     | 0.6  |
| Chloride               | %     | 0.4  |
| Magnesium              | %     | 0.2  |
| Zinc                   | mg/kg | 70   |
| Manganese              | mg/kg | 100  |
| Copper                 | mg/kg | 15   |
| Iodine                 | mg/kg | 6    |
| Iron                   | mg/kg | 200  |
| Selenium               | mg/kg | 0.23 |

| Amino Acids   |   |     |
|---------------|---|-----|
| Aspartic Acid | % | 1.0 |
| Glutamic Acid | % | 3.3 |
| Alanine       | % | 0.9 |
| Glycine       | % | 0.7 |
| Threonine     | % | 0.6 |
| Proline       | % | 1.5 |
| Serine        | % | 0.8 |
| Leucine       | % | 1.9 |
| Isoleucine    | % | 0.7 |
| Valine        | % | 0.8 |
| Phenylalanine | % | 0.9 |
| Tyrosine      | % | 0.5 |
| Methionine    | % | 0.3 |
| Cystine       | % | 0.3 |
| Lysine        | % | 0.8 |
| Histidine     | % | 0.4 |
| Arginine      | % | 0.8 |
| Tryptophan    | % | 0.2 |

| Vitamins                                 |       |      |
|------------------------------------------|-------|------|
| Vitamin A <sup>e,f</sup>                 | IU/g  | 15.0 |
| Vitamin D <sub>3</sub> <sup>g,h</sup>    | IU/g  | 1.5  |
| Vitamin E                                | IU/kg | 110  |
| Vitamin K <sub>3</sub> (menadione)       | mg/kg | 50   |
| Vitamin B <sub>1</sub> (thiamin)         | mg/kg | 17   |
| Vitamin B <sub>2</sub> (riboflavin)      | mg/kg | 15   |
| Niacin (nicotinic acid)                  | mg/kg | 75   |
| Vitamin B <sub>6</sub> (pyridoxine)      | mg/kg | 18   |
| Pantothenic Acid                         | mg/kg | 33   |
| Vitamin B <sub>12</sub> (cyanocobalamin) | mg/kg | 0.08 |
| Biotin                                   | mg/kg | 0.40 |
| Folate                                   | mg/kg | 4    |
| Choline                                  | mg/kg | 1030 |

| Fatty Acids           |   |     |
|-----------------------|---|-----|
| C16:0 Palmitic        | % | 0.5 |
| C18:0 Stearic         | % | 0.1 |
| C18:1ω9 Oleic         | % | 0.7 |
| C18:2ω6 Linoleic      | % | 2.0 |
| C18:3ω3 Linolenic     | % | 0.1 |
| Total Saturated       | % | 0.6 |
| Total Monounsaturated | % | 0.7 |
| Total Polyunsaturated | % | 2.1 |

| Other       |       |    |
|-------------|-------|----|
| Cholesterol | mg/kg | -- |

<sup>a</sup> Ether extract is used to measure fat in pelleted diets, while an acid hydrolysis method is required to recover fat in extruded diets. Compared to ether extract, the fat value for acid hydrolysis will be approximately 1% point higher.

<sup>b</sup> Carbohydrate (available) is calculated by subtracting neutral detergent fiber from total carbohydrates.

<sup>c</sup> Neutral detergent fiber is an estimate of insoluble fiber, including cellulose, hemicellulose, and lignin. Crude fiber methodology underestimates total fiber.

<sup>d</sup> Energy density is a calculated estimate of metabolizable energy based on the Atwater factors assigning 4 kcal/g to protein, 9 kcal/g to fat, and 4 kcal/g to available carbohydrate.

<sup>e</sup> Indicates added amount but does not account for contribution from other ingredients.

<sup>f</sup> 1 IU vitamin A = 0.3 µg retinol

<sup>g</sup> 1 IU vitamin D = 25 ng cholecalciferol

For nutrients not listed, insufficient data is available to quantify.

Nutrient data represent the best information available, calculated from published values and direct analytical testing of raw materials and finished product. Nutrient values may vary due to the natural variations in the ingredients, analysis, and effects of processing.

Teklad Diets are designed and manufactured for research purposes only.

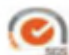



## Teklad Rodent Diet

**Product Description-** 8604 is a fixed formula, non-autoclavable diet manufactured with high quality ingredients and designed to support growth and reproduction of rodents. Typical isoflavone concentrations (daidzein + genistein aglycone equivalents) range from 350 to 650 mg/kg. **Also available certified (8728C).**

| Macronutrients                        |               |            |
|---------------------------------------|---------------|------------|
| Crude Protein                         | %             | 24.3       |
| Fat (ether extract) <sup>a</sup>      | %             | 4.7        |
| Carbohydrate (available) <sup>b</sup> | %             | 40.2       |
| Crude Fiber                           | %             | 4.0        |
| Neutral Detergent Fiber <sup>c</sup>  | %             | 12.4       |
| Ash                                   | %             | 7.4        |
| Energy Density <sup>d</sup>           | kcal/g (kJ/g) | 3.0 (12.6) |
| Calories from Protein                 | %             | 32         |
| Calories from Fat                     | %             | 14         |
| Calories from Carbohydrate            | %             | 54         |
| Minerals                              |               |            |
| Calcium                               | %             | 1.4        |
| Phosphorus                            | %             | 1.1        |
| Non-Phytate Phosphorus                | %             | 0.7        |
| Sodium                                | %             | 0.3        |
| Potassium                             | %             | 1.0        |
| Chloride                              | %             | 0.5        |
| Magnesium                             | %             | 0.3        |
| Zinc                                  | mg/kg         | 80         |
| Manganese                             | mg/kg         | 100        |
| Copper                                | mg/kg         | 25         |
| Iodine                                | mg/kg         | 2          |
| Iron                                  | mg/kg         | 300        |
| Selenium                              | mg/kg         | 0.34       |
| Amino Acids                           |               |            |
| Aspartic Acid                         | %             | 2.3        |
| Glutamic Acid                         | %             | 4.1        |
| Alanine                               | %             | 1.4        |
| Glycine                               | %             | 1.3        |
| Threonine                             | %             | 0.9        |
| Proline                               | %             | 1.6        |
| Serine                                | %             | 1.6        |
| Leucine                               | %             | 1.9        |
| Isoleucine                            | %             | 1.0        |
| Valine                                | %             | 1.1        |
| Phenylalanine                         | %             | 1.1        |
| Tyrosine                              | %             | 0.9        |
| Methionine                            | %             | 0.4        |
| Cystine                               | %             | 0.4        |
| Lysine                                | %             | 1.4        |
| Histidine                             | %             | 0.6        |
| Arginine                              | %             | 1.5        |
| Tryptophan                            | %             | 0.3        |

Teklad Diets are designed and manufactured for research purposes only.

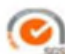

**Ingredients** (in descending order of inclusion)- Dehulled soybean meal, wheat middlings, flaked corn, ground corn, fish meal, cane molasses, ground wheat, dried whey, soybean oil, brewers dried yeast, dicalcium phosphate, calcium carbonate, iodized salt, choline chloride, kaolin, magnesium oxide, ferrous sulfate, vitamin E acetate, menadione sodium bisulfite complex (source of vitamin K activity), manganous oxide, copper sulfate, zinc oxide, niacin, thiamin mononitrate, vitamin A acetate, vitamin D<sub>3</sub> supplement, calcium pantothenate, pyridoxine hydrochloride, riboflavin, vitamin B<sub>12</sub> supplement, calcium iodate, folic acid, biotin, cobalt carbonate.

Standard Product Form: **Pellet**

| Vitamins                                 |       |      |
|------------------------------------------|-------|------|
| Vitamin A <sup>e,1</sup>                 | IU/g  | 12.6 |
| Vitamin D <sub>3</sub> <sup>e,2</sup>    | IU/g  | 2.4  |
| Vitamin E                                | IU/kg | 120  |
| Vitamin K <sub>3</sub> (menadione)       | mg/kg | 40   |
| Vitamin B <sub>1</sub> (thiamin)         | mg/kg | 27   |
| Vitamin B <sub>2</sub> (riboflavin)      | mg/kg | 8    |
| Niacin (nicotinic acid)                  | mg/kg | 63   |
| Vitamin B <sub>6</sub> (pyridoxine)      | mg/kg | 13   |
| Pantothenic Acid                         | mg/kg | 21   |
| Vitamin B <sub>12</sub> (cyanocobalamin) | mg/kg | 0.05 |
| Biotin                                   | mg/kg | 0.38 |
| Folate                                   | mg/kg | 3    |
| Choline                                  | mg/kg | 2530 |
| Fatty Acids                              |       |      |
| C16:0 Palmitic                           | %     | 0.7  |
| C18:0 Stearic                            | %     | 0.1  |
| C18:1ω9 Oleic                            | %     | 0.9  |
| C18:2ω6 Linoleic                         | %     | 1.9  |
| C18:3ω3 Linolenic                        | %     | 0.2  |
| Total Saturated                          | %     | 0.9  |
| Total Monounsaturated                    | %     | 1.1  |
| Total Polyunsaturated                    | %     | 2.1  |
| Other                                    |       |      |
| Cholesterol                              | mg/kg | 50   |

<sup>a</sup> Ether extract is used to measure fat in pelleted diets, while an acid hydrolysis method is required to recover fat in extruded diets. Compared to ether extract, the fat value for acid hydrolysis will be approximately 1% point higher.

<sup>b</sup> Carbohydrate (available) is calculated by subtracting neutral detergent fiber from total carbohydrates.

<sup>c</sup> Neutral detergent fiber is an estimate of insoluble fiber, including cellulose, hemicellulose, and lignin. Crude fiber methodology underestimates total fiber.

<sup>d</sup> Energy density is a calculated estimate of metabolizable energy based on the Atwater factors assigning 4 kcal/g to protein, 9 kcal/g to fat, and 4 kcal/g to available carbohydrate.

<sup>e</sup> Indicates added amount but does not account for contribution from other ingredients.

<sup>1</sup> 1 IU vitamin A = 0.3 µg retinol

<sup>2</sup> 1 IU vitamin D = 25 ng cholecalciferol

For nutrients not listed, insufficient data is available to quantify.

Nutrient data represent the best information available, calculated from published values and direct analytical testing of raw materials and finished product. Nutrient values may vary due to the natural variations in the ingredients, analysis, and effects of processing.

## DESCRIPTION

PicoLab<sup>®</sup> Rodent Diet 20 is a 20% protein diet formulated for rat, hamster and mouse breeding colonies. This diet is formulated using the unique and innovative concept of Constant Nutrition<sup>®</sup>, paired with the selection of highest quality ingredients to assure minimal inherent biological variation in long-term studies. Irradiation gives reliable microbial control and eliminates the need for autoclaving. Irradiation treatment and special 3-ply packaging provide virtually bacteria-free dietary control.

### Features and Benefits

- Constant Nutrition<sup>®</sup> formula helps minimize nutritional variables
- Formulated with 20% protein
- High quality animal protein added to create a superior balance of amino acids for optimum performance
- Recommended for rat breeding colonies and mice not requiring a higher energy diet
- Precision processing and selection of highest quality ingredients assures Constant Nutrition<sup>®</sup> quality
- Irradiation gives reliable microbial control and eliminates the need for autoclaving

### Product Forms Available

- Oval pellet, 10 mm x 16 mm x 25 mm length (3/8"x5/8"x1")
- Meal (ground pellets), special order

### Other Versions Available

- 5061 Pico-Vac<sup>®</sup> Lab Rodent Diet

## GUARANTEED ANALYSIS

|                             |       |
|-----------------------------|-------|
| Crude protein not less than | 20.0% |
| Crude fat not less than     | 4.5%  |
| Crude fiber not more than   | 6.0%  |
| Ash not more than           | 7.0%  |

## INGREDIENTS

Ground corn, dehulled soybean meal, wheat middlings, ground wheat, fish meal, cane molasses, wheat germ, dried beet pulp, brewers dried yeast, dehydrated alfalfa meal, ground oats, soybean oil, dried whey, calcium carbonate, salt, DL-methionine, menadione dimethylpyrimidinol bisulfite (vitamin K), choline chloride, pyridoxine hydrochloride, cholecalciferol, vitamin A acetate, dl-alpha tocopheryl acetate, biotin, thiamin mononitrate, folic acid, vitamin B<sub>12</sub> supplement, nicotinic acid, riboflavin, calcium pantothenate, manganous oxide, zinc oxide, ferrous carbonate, copper sulfate, zinc sulfate, calcium iodate, cobalt carbonate, sodium selenite.

## FEEDING DIRECTIONS

Feed ad libitum to rodents. Plenty of fresh, clean water should be available to the animals at all times.

**Rats-** All rats will eat varying amounts of feed depending on their genetic origin. Larger strains will eat up to 30 grams per day. Smaller strains will eat up to 15 grams per day. Feeders in rat cages should be designed to hold two to three days supply of feed at one time.

**Mice-** Adult mice will eat up to 5 grams of pelleted ration daily. Some of the larger strains may eat as much as 8 grams per day per animal. Feed should be available on a free choice basis in wire feeders above the floor of the cage.

**Hamsters-** Adults will eat up to 14 grams per day.

## CHEMICAL COMPOSITION<sup>1</sup>

### Nutrients<sup>2</sup>

|                   |             |
|-------------------|-------------|
| <b>Protein, %</b> | <b>20.0</b> |
| Arginine, %       | 1.22        |
| Cystine, %        | 0.28        |
| Glycine, %        | 0.96        |
| Histidine, %      | 0.50        |
| Isoleucine, %     | 0.97        |
| Leucine, %        | 1.56        |
| Lysine, %         | 1.16        |
| Methionine, %     | 0.70        |
| Phenylalanine, %  | 0.90        |
| Tyrosine, %       | 0.59        |
| Threonine, %      | 0.77        |
| Tryptophan, %     | 0.26        |
| Valine, %         | 1.00        |
| Serine, %         | 1.03        |
| Aspartic Acid, %  | 2.19        |
| Glutamic Acid, %  | 4.34        |
| Alanine, %        | 1.15        |
| Proline, %        | 1.47        |
| Taurine, %        | 0.02        |

**Fat (ether extract), %** 5.0

**Fat (acid hydrolysis), %** 5.6

Cholesterol, ppm 141

Linoleic Acid, % 2.19

Linolenic Acid, % 0.26

Arachidonic Acid, % <0.01

Omega-3 Fatty Acids, % 0.33

Total Saturated Fatty Acids, % 0.93

Total Monounsaturated

Fatty Acids, % 0.99

**Fiber (Crude), %** 4.7

Neutral Detergent Fiber<sup>3</sup>, % 16.4

Acid Detergent Fiber<sup>4</sup>, % 6.0

**Nitrogen-Free Extract**

**(by difference), %** 52.9

Starch, % 33.9

Glucose, % 0.19

Fructose, % 0.23

Sucrose, % 3.18

Lactose, % 1.34

**Total Digestible Nutrients, %** 76.2

**Gross Energy, kcal/gm** 4.07

**Physiological Fuel Value<sup>5</sup>,**

**kcal/gm** 3.41

**Metabolizable Energy,**

**kcal/gm** 3.07

**Minerals**

**Ash, %** 6.1

Calcium, % 0.81

Phosphorus, % 0.63

Phosphorus (non-phytate), % 0.33

Potassium, % 1.07

Magnesium, % 0.22

Sulfur, % 0.34

Sodium, % 0.30

Chlorine, % 0.51

Fluorine, ppm 10

Iron, ppm 220

Zinc, ppm 87

Manganese, ppm 85

Copper, ppm 13

Cobalt, ppm 0.71

Iodine, ppm 0.97

Chromium, ppm 0.81

Selenium, ppm 0.30

**Vitamins**

Carotene, ppm 1.5

Vitamin K (as menadione), ppm 3.3

Thiamin Hydrochloride, ppm 17

Riboflavin, ppm 8.0

Niacin, ppm 90

Pantothenic Acid, ppm 17

Choline Chloride, ppm 2000

Folic Acid, ppm 3.0

Pyridoxine, ppm 9.6

Biotin, ppm 0.30

B<sub>12</sub>, mcg/kg 51

Vitamin A, IU/gm 15

Vitamin D<sub>3</sub> (added), IU/gm 2.2

Vitamin E, IU/kg 99

Ascorbic Acid, mg/gm —

**Calories provided by:**

Protein, % 24.651

Fat (ether extract), % 13.205

Carbohydrates, % 62.144

\*Product Code

1. Formulation based on calculated

values from the latest ingredient

analysis information. Since

nutrient composition of natural

ingredients varies and some

nutrient loss will occur due to

manufacturing processes, analysis

will differ accordingly.

2. Nutrients expressed as percent of

ration except where otherwise

indicated. Moisture content is

assumed to be 10.0% for the

purpose of calculations.

3. NDF = approximately cellulose,

hemi-cellulose and lignin.

4. ADF = approximately cellulose

and lignin.

5. Physiological Fuel Value

(kcal/gm) = Sum of decimal

fractions of protein, fat and carbo-

hydrate (use Nitrogen Free

Extract) x 4.9,4 kcal/gm

respectively.

## DESCRIPTION

PicoLab<sup>®</sup> Mouse Diet 20 is a Constant Nutrition<sup>®</sup> formulation providing 20% protein for mouse colonies that require extra levels of energy needed for maximum production in post-partum breeding. Irradiation treatment and special 4-ply packaging provide virtually bacteria-free dietary control.

### Features and Benefits

- Formulated with 20% protein for mouse breeding colonies
- Precision processing and selection of highest quality ingredients assures Constant Nutrition<sup>®</sup> quality
- Designed to meet the energy needs of breeding mouse colonies, transgenic strains, and mice exposed to higher stress levels
- Irradiation gives reliable microbial control and eliminates the need for autoclaving

### Product Forms Available

- Oval pellet, 10 mm x 16 mm x 25 mm length (3/8"x5/8"x1")
- Meal (ground pellets), special order

### Other Versions Available

- 5062 Pico-Vac<sup>®</sup> Mouse Diet 20

## GUARANTEED ANALYSIS

|                              |       |
|------------------------------|-------|
| Crude protein not less than  | 20.0% |
| Crude fat not less than      | 9.0%  |
| Crude fiber not more than    | 4.0%  |
| Ash not more than            | 6.5%  |
| Added minerals not more than | 2.5%  |

## INGREDIENTS

Ground wheat, ground corn, dehulled soybean meal, wheat germ, fish meal, brewers dried yeast, corn gluten meal, porcine animal fat preserved with BHA, soybean oil, calcium carbonate, salt, dicalcium phosphate, monocalcium phosphate, choline chloride, menadione dimethylpyrimidinol bisulfite, DL-methionine, vitamin A acetate, cholecalciferol, pyridoxine hydrochloride, dried whey, folic acid, dl-alpha tocopheryl acetate, biotin, thiamin mononitrate, calcium pantothenate, lecithin, riboflavin, nicotinic acid, casein, vitamin B<sub>12</sub> supplement, manganous oxide, zinc oxide, ferrous carbonate, copper sulfate, zinc sulfate, calcium iodate, cobalt carbonate, sodium selenite.

## FEEDING DIRECTIONS

Feed ad libitum to mice. Plenty of fresh, clean water should be available to the animals at all times.

**Mice**-Adult mice will eat up to 5 grams of pelleted ration daily. Some of the larger strains may eat as much as 8 grams per day per animal. Feed should be available on a free choice basis in wire feeders above the floor of the cage.

## CHEMICAL COMPOSITION<sup>1</sup>

| Nutrients <sup>2</sup>                               |             |                                                                                                                                                                                                                                                         |        |
|------------------------------------------------------|-------------|---------------------------------------------------------------------------------------------------------------------------------------------------------------------------------------------------------------------------------------------------------|--------|
| Protein, %                                           | 21.8        | Sulfur, %                                                                                                                                                                                                                                               | .027   |
| Arginine, %                                          | 1.15        | Sodium, %                                                                                                                                                                                                                                               | .025   |
| Cystine, %                                           | .031        | Chlorine, %                                                                                                                                                                                                                                             | .042   |
| Glycine, %                                           | .093        | Fluorine, ppm                                                                                                                                                                                                                                           | .12    |
| Histidine, %                                         | .050        | Iron, ppm                                                                                                                                                                                                                                               | .200   |
| Isoleucine, %                                        | 1.02        | Zinc, ppm                                                                                                                                                                                                                                               | .120   |
| Leucine, %                                           | 1.82        | Manganese, ppm                                                                                                                                                                                                                                          | .120   |
| Lysine, %                                            | 1.13        | Copper, ppm                                                                                                                                                                                                                                             | .17    |
| Methionine, %                                        | .067        | Cobalt, ppm                                                                                                                                                                                                                                             | .055   |
| Phenylalanine, %                                     | .097        | Iodine, ppm                                                                                                                                                                                                                                             | .15    |
| Tyrosine, %                                          | .064        | Chromium, ppm                                                                                                                                                                                                                                           | .056   |
| Threonine, %                                         | .079        | Selenium, ppm                                                                                                                                                                                                                                           | .030   |
| Tryptophan, %                                        | .025        |                                                                                                                                                                                                                                                         |        |
| Valine, %                                            | 1.03        | <b>Vitamins</b>                                                                                                                                                                                                                                         |        |
| Serine, %                                            | 1.07        | Carotene, ppm                                                                                                                                                                                                                                           | Trace  |
| Aspartic Acid, %                                     | 2.13        | Vitamin K (as menadione), ppm                                                                                                                                                                                                                           | 3.1    |
| Glutamic Acid, %                                     | 4.47        | Thiamin Hydrochloride, ppm                                                                                                                                                                                                                              | .15    |
| Alanine, %                                           | 1.34        | Riboflavin, ppm                                                                                                                                                                                                                                         | 8.0    |
| Proline, %                                           | 1.54        | Niacin, ppm                                                                                                                                                                                                                                             | .90    |
| Taurine, %                                           | .002        | Pantothenic Acid, ppm                                                                                                                                                                                                                                   | .21    |
| <b>Fat (ether extract), %</b>                        | <b>9.0</b>  | Choline Chloride, ppm                                                                                                                                                                                                                                   | .2200  |
| <b>Fat (acid hydrolysis), %</b>                      | <b>9.1</b>  | Folic Acid, ppm                                                                                                                                                                                                                                         | 2.9    |
| Cholesterol, ppm                                     | .200        | Pyridoxine, ppm                                                                                                                                                                                                                                         | 9.6    |
| Linoleic Acid, %                                     | 2.32        | Biotin, ppm                                                                                                                                                                                                                                             | .030   |
| Linolenic Acid, %                                    | .021        | B <sub>12</sub> , mcg/kg                                                                                                                                                                                                                                | .51    |
| Arachidonic Acid, %                                  | .002        | Vitamin A, IU/gm                                                                                                                                                                                                                                        | .15    |
| Omega-3 Fatty Acids, %                               | .032        | Vitamin D <sub>3</sub> (added), IU/gm                                                                                                                                                                                                                   | 3.3    |
| Total Saturated Fatty Acids, %                       | 2.72        | Vitamin E, IU/kg                                                                                                                                                                                                                                        | .57    |
| Total Monounsaturated                                |             | Ascorbic Acid, mg/gm                                                                                                                                                                                                                                    | —      |
| Fatty Acids, %                                       | 2.88        |                                                                                                                                                                                                                                                         |        |
| <b>Fiber (Crude), %</b>                              | <b>2.2</b>  | <b>Calories provided by:</b>                                                                                                                                                                                                                            |        |
| Neutral Detergent Fiber <sup>3</sup> , %             | 10.8        | Protein, %                                                                                                                                                                                                                                              | 23.189 |
| Acid Detergent Fiber <sup>4</sup> , %                | 3.0         | Fat (ether extract), %                                                                                                                                                                                                                                  | 21.635 |
| <b>Nitrogen-Free Extract</b>                         |             | Carbohydrates, %                                                                                                                                                                                                                                        | 55.176 |
| <b>(by difference), %</b>                            | <b>51.8</b> | <b>*Product Code</b>                                                                                                                                                                                                                                    |        |
| Starch, %                                            | 39.3        | 1. Formulation based on calculated values from the latest ingredient analysis information. Since nutrient composition of natural ingredients varies and some nutrient loss will occur due to manufacturing processes, analysis will differ accordingly. |        |
| Glucose, %                                           | .016        | 2. Nutrients expressed as percent of ration except where otherwise indicated. Moisture content is assumed to be 10.0% for the purpose of calculations.                                                                                                  |        |
| Fructose, %                                          | .016        | 3. NDF = approximately cellulose, hemicellulose and lignin.                                                                                                                                                                                             |        |
| Sucrose, %                                           | .071        | 4. ADF = approximately cellulose and lignin.                                                                                                                                                                                                            |        |
| Lactose, %                                           | .078        | 5. Physiological Fuel Value (kcal/gm) = Sum of decimal fractions of protein, fat and carbohydrate (use Nitrogen Free Extract) x 4,9,4 kcal/gm respectively.                                                                                             |        |
| <b>Total Digestible Nutrients, %</b>                 | <b>85.3</b> |                                                                                                                                                                                                                                                         |        |
| <b>Gross Energy, kcal/gm</b>                         | <b>4.60</b> |                                                                                                                                                                                                                                                         |        |
| <b>Physiological Fuel Value<sup>5</sup>, kcal/gm</b> | <b>3.75</b> |                                                                                                                                                                                                                                                         |        |
| <b>Metabolizable Energy, kcal/gm</b>                 | <b>3.56</b> |                                                                                                                                                                                                                                                         |        |
|                                                      |             |                                                                                                                                                                                                                                                         |        |
| <b>Minerals</b>                                      |             |                                                                                                                                                                                                                                                         |        |
| Ash, %                                               | 5.0         |                                                                                                                                                                                                                                                         |        |
| Calcium, %                                           | .081        |                                                                                                                                                                                                                                                         |        |
| Phosphorus, %                                        | .060        |                                                                                                                                                                                                                                                         |        |
| Phosphorus (non-phytate), %                          | .033        |                                                                                                                                                                                                                                                         |        |
| Potassium, %                                         | .070        |                                                                                                                                                                                                                                                         |        |
| Magnesium, %                                         | .016        |                                                                                                                                                                                                                                                         |        |

## SAFE® A04

Page 2/2

### Ingredients

Barley, wheat, maize, soybean meal, wheat bran, hydrolyzed fish proteins, dicalcium phosphate, pre-mixture of minerals, calcium carbonate, pre-mixture of vitamins.

### CENTESIMAL COMPOSITION

|                     |        |
|---------------------|--------|
| Cereals             | 84.1 % |
| Animal Proteins     | 4.0 %  |
| Vegetal Proteins    | 8.0 %  |
| Vitamins & Minerals | 3.9 %  |

### NUTRITIONAL COMPOSITION

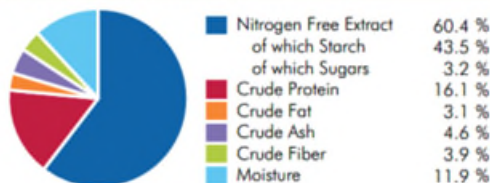

### ENERGY CONTENT

|                      | MJ/kg | kcal/kg | %    |
|----------------------|-------|---------|------|
| ME Pig               | 13.2  | 3 145   |      |
| ME Atwater           | 14.0  | 3 339   |      |
| Energy from proteins | 2.7   | 644     | 19.3 |
| Energy from lipids   | 1.2   | 279     | 8.4  |
| Energy from NFE      | 10.1  | 2 416   | 72.4 |

More information on energy calculation: [www.safe-lab.com](http://www.safe-lab.com)

### Analysis End Product

TOTAL PER KG

#### AMINO ACIDS

|          |          |             |          |
|----------|----------|-------------|----------|
| Arginine | 9 000 mg | Méthionine  | 2 800 mg |
| Cystine  | 2 500 mg | Tryptophane | 1 900 mg |
| Lysine   | 7 200 mg | Glycine     | 8 100 mg |

#### FATTY ACIDS

|                  |           |
|------------------|-----------|
| Palmitic acid    | 5 900 mg  |
| Stearic acid     | 600 mg    |
| Palmitoleic acid | 150 mg    |
| Oleic acid       | 4 800 mg  |
| LA               | 15 000 mg |
| ALA              | 1 200 mg  |

#### MINERALS

| MINERALS   | END PRODUCT |
|------------|-------------|
| Calcium    | 7 300 mg    |
| Phosphorus | 5 500 mg    |
| Sodium     | 2 500 mg    |
| Potassium  | 6 000 mg    |
| Magnesium  | 1 600 mg    |
| Manganese  | 70 mg       |
| Iron       | 270 mg      |
| Copper     | 16 mg       |
| Zinc       | 55 mg       |
| Chlorine   | 4 000 mg    |

#### VITAMINS

| VITAMINS    | END PRODUCT |
|-------------|-------------|
| Vitamin A   | 7 500 IU    |
| Vitamin D3  | 1 000 IU    |
| Vitamin E   | 30 IU       |
| Vitamin K3  | 2.5 mg      |
| Vitamin B1  | 5.0 mg      |
| Vitamin B2  | 6.5 mg      |
| Vitamin B3  | 70 mg       |
| Vitamin B5  | 10 mg       |
| Vitamin B6  | 3.0 mg      |
| Vitamin B9  | 0.35 mg     |
| Vitamin B12 | 0.010 mg    |
| Biotin      | 0.080 mg    |
| Choline     | 1 600 mg    |

For the welfare of animals SAFE® bedding and environmental enrichment such as SAFE® block gnawing logs and SAFE® nesting materials should be available in the cage.

The values of the end products are given as indication only and have no contractual value. They are calculated averages of product analysis results before irradiation and autoclaving. Depending on production conditions, storage and analytical methods variations may occur. An analysis is performed on request.

Produced in France

**Product# F3155 - Rodent Diet, AIN-93M, 1/2" Pellets**

**Product# F3198 - Rodent Diet, AIN-93M, Powder**

### Proximate Profile

|              |   |      |
|--------------|---|------|
| Protein      | % | 12.6 |
| Fat          | % | 4.1  |
| Fiber        | % | 4.8  |
| Ash          | % | 2.2  |
| Moisture     | % | <10  |
| Carbohydrate | % | 67.5 |

### Caloric Profile

|              |                |             |
|--------------|----------------|-------------|
| Protein      | kcal/gm        | 0.51        |
| Fat          | kcal/gm        | 0.37        |
| Carbohydrate | kcal/gm        | 2.70        |
| <b>Total</b> | <b>kcal/gm</b> | <b>3.58</b> |

### Amino Acids

|               |       |      |
|---------------|-------|------|
| Alanine       | gm/kg | 3.2  |
| Arginine      | gm/kg | 4.5  |
| Aspartic Acid | gm/kg | 7.9  |
| Cystine       | gm/kg | 2.2  |
| Glutamic Acid | gm/kg | 24.9 |
| Glycine       | gm/kg | 3.0  |
| Histidine     | gm/kg | 3.4  |
| Isoleucine    | gm/kg | 6.7  |
| Leucine       | gm/kg | 10.2 |
| Lysine        | gm/kg | 9.1  |
| Methionine    | gm/kg | 3.1  |
| Phenylalanine | gm/kg | 5.5  |
| Proline       | gm/kg | 12.6 |
| Serine        | gm/kg | 7.0  |
| Threonine     | gm/kg | 5.4  |
| Tryptophan    | gm/kg | 1.4  |
| Tyrosine      | gm/kg | 7.0  |
| Valine        | gm/kg | 8.0  |

### Carbohydrates

|                 |       |     |
|-----------------|-------|-----|
| Monosaccharides | gm/kg | 0.7 |
| Disaccharides   | gm/kg | 120 |
| Polysaccharides | gm/kg | 549 |

### Fatty Acids

|                       |       |      |
|-----------------------|-------|------|
| C18:2 Linoleic        | gm/kg | 20.4 |
| C18:3 Linolenic       | gm/kg | 2.7  |
| Total Saturated       | gm/kg | 6.3  |
| Total Monounsaturated | gm/kg | 9.1  |
| Total Polyunsaturated | gm/kg | 23.1 |

### Minerals

|            |       |      |
|------------|-------|------|
| Calcium    | gm/kg | 5.0  |
| Chloride   | gm/kg | 1.6  |
| Copper     | mg/kg | 6.0  |
| Chromium   | mg/kg | 1.0  |
| Fluoride   | mg/kg | 1.0  |
| Iodine     | mg/kg | 0.21 |
| Iron       | mg/kg | 36.6 |
| Magnesium  | gm/kg | 0.51 |
| Manganese  | mg/kg | 10.5 |
| Phosphorus | gm/kg | 2.8  |
| Potassium  | gm/kg | 3.6  |
| Selenium   | mg/kg | 0.17 |
| Sodium     | mg/kg | 1032 |
| Sulfur     | mg/kg | 301  |
| Zinc       | mg/kg | 35.4 |

### Vitamins

|                                        |        |      |
|----------------------------------------|--------|------|
| Ascorbic Acid                          | mg/kg  | 0.0  |
| Biotin                                 | mg/kg  | 0.20 |
| Choline                                | mg/kg  | 1028 |
| Folic Acid                             | mg/kg  | 2.0  |
| Niacin                                 | mg/kg  | 30.0 |
| Pantothenic Acid                       | mg/kg  | 14.7 |
| Pyridoxine                             | mg/kg  | 5.8  |
| Riboflavin                             | mg/kg  | 6.0  |
| Thiamin                                | mg/kg  | 5.3  |
| Vitamin A                              | IU/kg  | 4100 |
| Vitamin B <sub>12</sub>                | mcg/kg | 25   |
| Vitamin D <sub>3</sub>                 | IU/kg  | 1000 |
| Vitamin E                              | IU/kg  | 79.9 |
| Vitamin K <sub>1</sub> (Phylloquinone) | mg/kg  | 0.82 |

### Ingredients

Corn Starch, Casein, Maltodextrin, Sucrose, Cellulose, Soybean Oil, Mineral Mix, Vitamin Mix, Choline Bitartrate, L-Cystine, tBHQ

These are typical amounts of nutrients calculated from available information. Actual assay results may vary. For more information contact Jaime Lecker, Ph.D. Phone: 800-996-9908 ext. 112 (U.S. and Canada) 908-996-2155 (International) Email: jlecker@bio-serv.com.

Revised Date: 1/11

**Product# F3156 - Rodent Diet, AIN-93G, 1/2" Pellets**

**Product# F3197 - Rodent Diet, AIN-93G, Powder**

### Proximate Profile

|              |   |      |
|--------------|---|------|
| Protein      | % | 18.1 |
| Fat          | % | 7.1  |
| Fiber        | % | 4.8  |
| Ash          | % | 2.2  |
| Moisture     | % | <10  |
| Carbohydrate | % | 59.3 |

### Caloric Profile

|              |                |             |
|--------------|----------------|-------------|
| Protein      | kcal/gm        | 0.72        |
| Fat          | kcal/gm        | 0.64        |
| Carbohydrate | kcal/gm        | 2.37        |
| <b>Total</b> | <b>kcal/gm</b> | <b>3.74</b> |

### Amino Acids

|               |       |      |
|---------------|-------|------|
| Alanine       | gm/kg | 4.6  |
| Arginine      | gm/kg | 6.4  |
| Aspartic Acid | gm/kg | 11.2 |
| Cystine       | gm/kg | 3.5  |
| Glutamic Acid | gm/kg | 35.6 |
| Glycine       | gm/kg | 4.3  |
| Histidine     | gm/kg | 4.8  |
| Isoleucine    | gm/kg | 9.6  |
| Leucine       | gm/kg | 14.6 |
| Lysine        | gm/kg | 13.0 |
| Methionine    | gm/kg | 4.5  |
| Phenylalanine | gm/kg | 7.8  |
| Proline       | gm/kg | 18.0 |
| Serine        | gm/kg | 10.0 |
| Threonine     | gm/kg | 7.7  |
| Tryptophan    | gm/kg | 2.0  |
| Tyrosine      | gm/kg | 10.0 |
| Valine        | gm/kg | 11.4 |

### Carbohydrates

|                 |       |     |
|-----------------|-------|-----|
| Monosaccharides | gm/kg | 0.6 |
| Disaccharides   | gm/kg | 120 |
| Polysaccharides | gm/kg | 468 |

### Fatty Acids

|                       |       |      |
|-----------------------|-------|------|
| C18:2 Linoleic        | gm/kg | 35.7 |
| C18:3 Linolenic       | gm/kg | 4.8  |
| Total Saturated       | gm/kg | 11.0 |
| Total Monounsaturated | gm/kg | 15.9 |
| Total Polyunsaturated | gm/kg | 40.4 |

### Minerals

|            |       |      |
|------------|-------|------|
| Calcium    | gm/kg | 5.1  |
| Chloride   | gm/kg | 1.6  |
| Copper     | mg/kg | 6.0  |
| Chromium   | mg/kg | 1.0  |
| Fluoride   | mg/kg | 1.0  |
| Iodine     | mg/kg | 0.21 |
| Iron       | mg/kg | 37.2 |
| Magnesium  | gm/kg | 0.51 |
| Manganese  | mg/kg | 10.5 |
| Phosphorus | gm/kg | 2.8  |
| Potassium  | gm/kg | 3.6  |
| Selenium   | mg/kg | 0.17 |
| Sodium     | mg/kg | 1030 |
| Sulfur     | mg/kg | 301  |
| Zinc       | mg/kg | 37.7 |

### Vitamins

|                                        |        |      |
|----------------------------------------|--------|------|
| Ascorbic Acid                          | mg/kg  | 0.0  |
| Biotin                                 | mg/kg  | 0.20 |
| Choline                                | mg/kg  | 1028 |
| Folic Acid                             | mg/kg  | 2.0  |
| Niacin                                 | mg/kg  | 30.0 |
| Pantothenic Acid                       | mg/kg  | 14.7 |
| Pyridoxine                             | mg/kg  | 5.8  |
| Riboflavin                             | mg/kg  | 6.0  |
| Thiamin                                | mg/kg  | 6.0  |
| Vitamin A                              | IU/kg  | 4140 |
| Vitamin B <sub>12</sub>                | mcg/kg | 25   |
| Vitamin D <sub>3</sub>                 | IU/kg  | 1000 |
| Vitamin E                              | IU/kg  | 83.5 |
| Vitamin K <sub>1</sub> (Phylloquinone) | mg/kg  | 0.88 |

### Ingredients

Corn Starch, Casein, Maltodextrin, Sucrose, Soybean Oil, Cellulose, Mineral Mix, Vitamin Mix, L-Cystine, Choline Bitartrate, tBHQ

These are typical amounts of nutrients calculated from available information. Actual assay results may vary. For more information contact Jaime Lecker, Ph.D. Phone: 800-996-9908 ext. 112 (U.S. and Canada) 908-996-2155 (International) Email: jlecker@bio-serv.com.

Revised Date: 1/11
